# Supplementary material for: Correction: Assessment of the Biological Pathways Targeted by Isocyanate Using N-Succinimidyl N-Methylcarbamate in Budding Yeast Saccharomyces cerevisiae
Source: PubMed Central journal article supplement (PMC11226043; doi:10.1371/journal.pone.0306937), 2024-07-05

Raw data for revised version of figure 2A

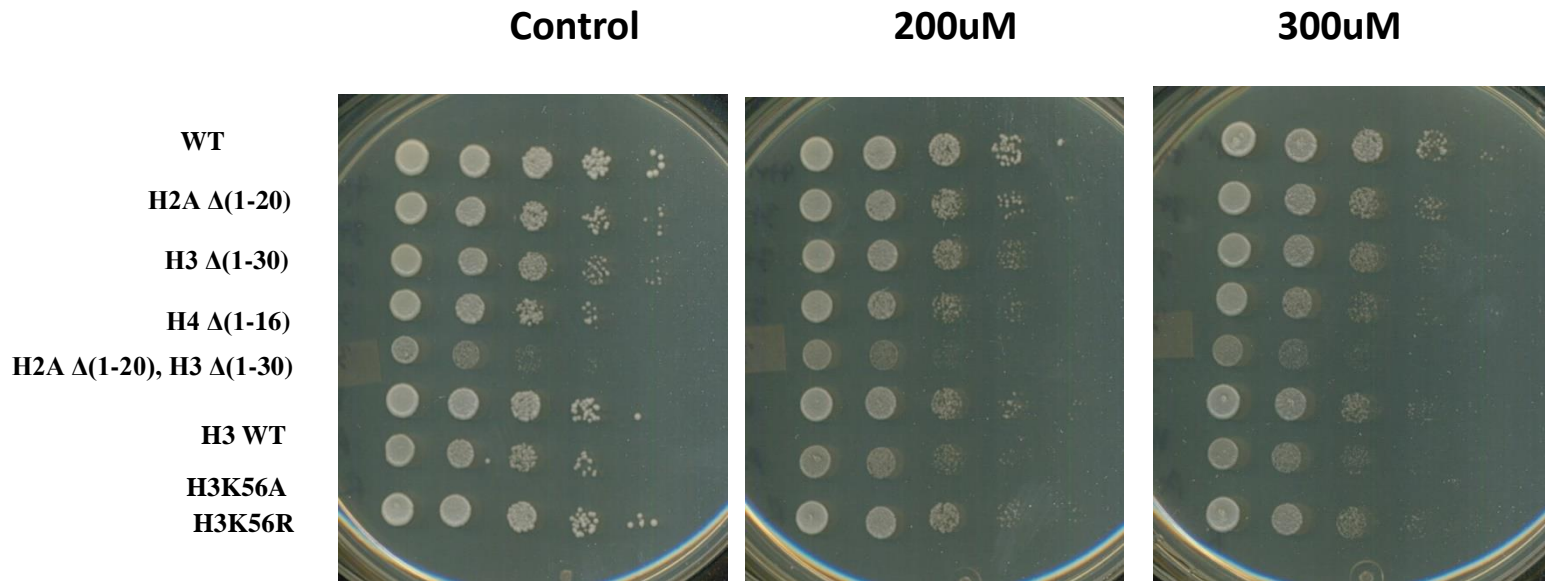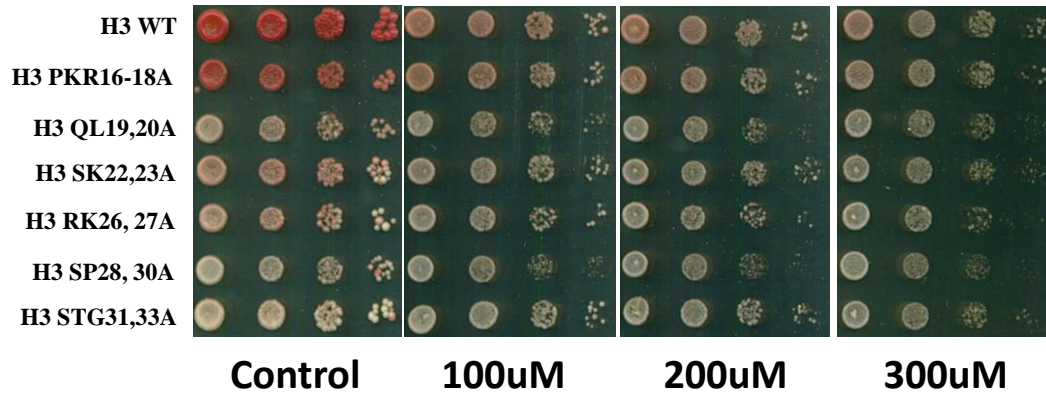

Raw data for revised  
version of figure 2B

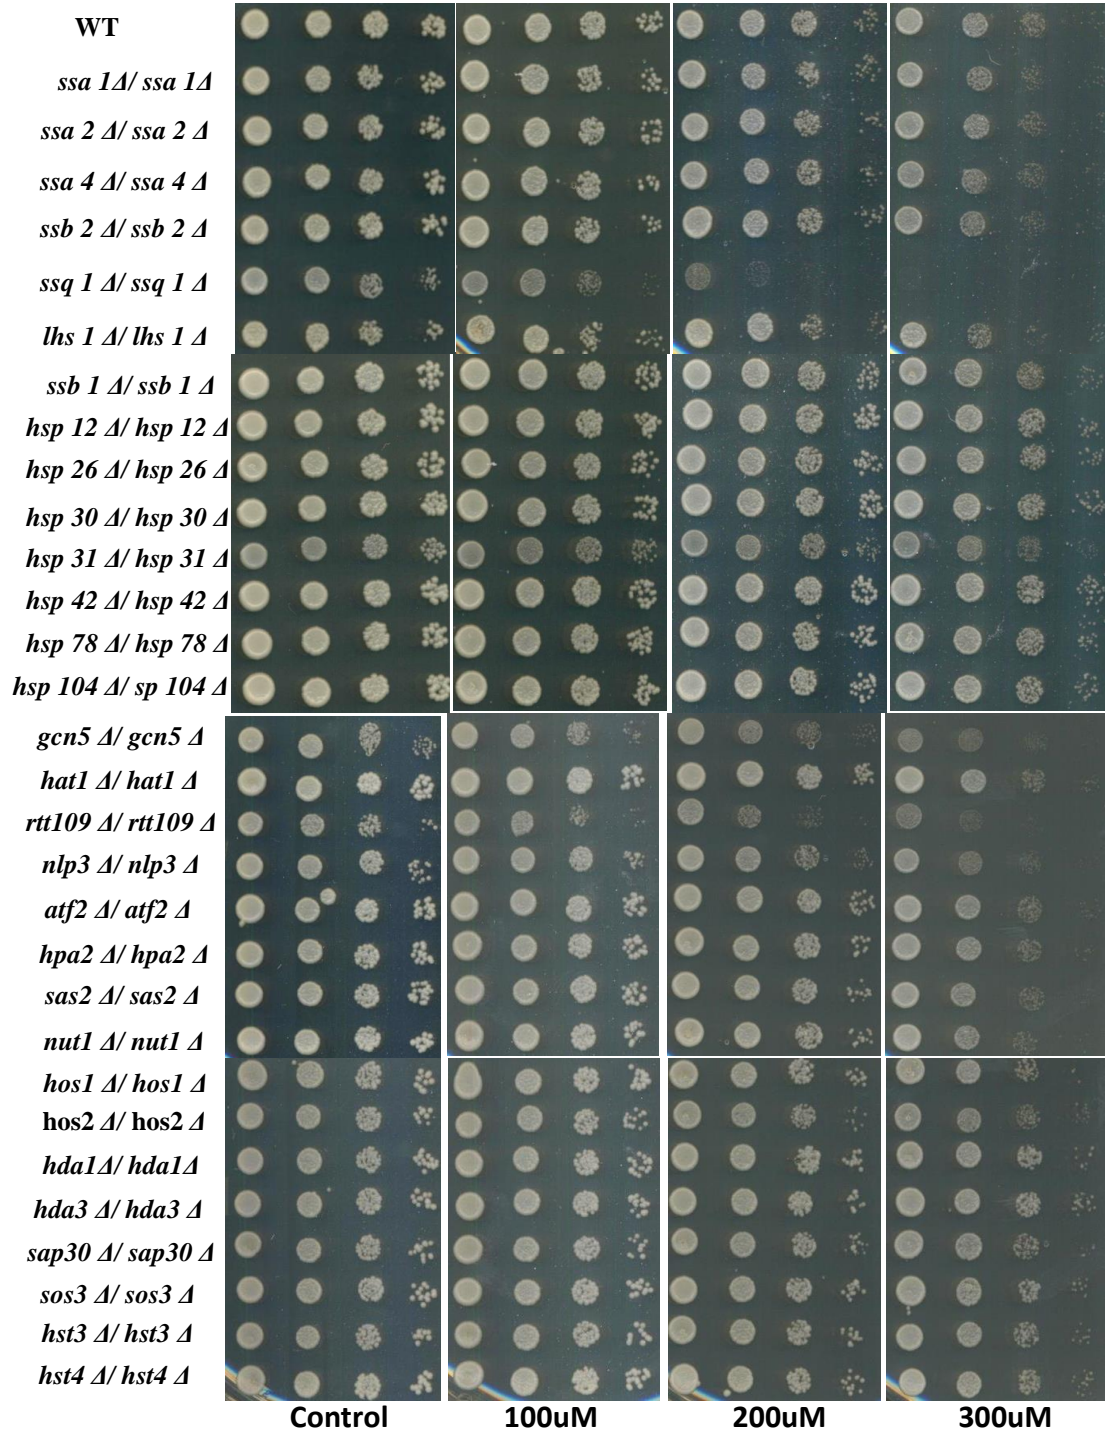

Raw data of revised version of figure 2C

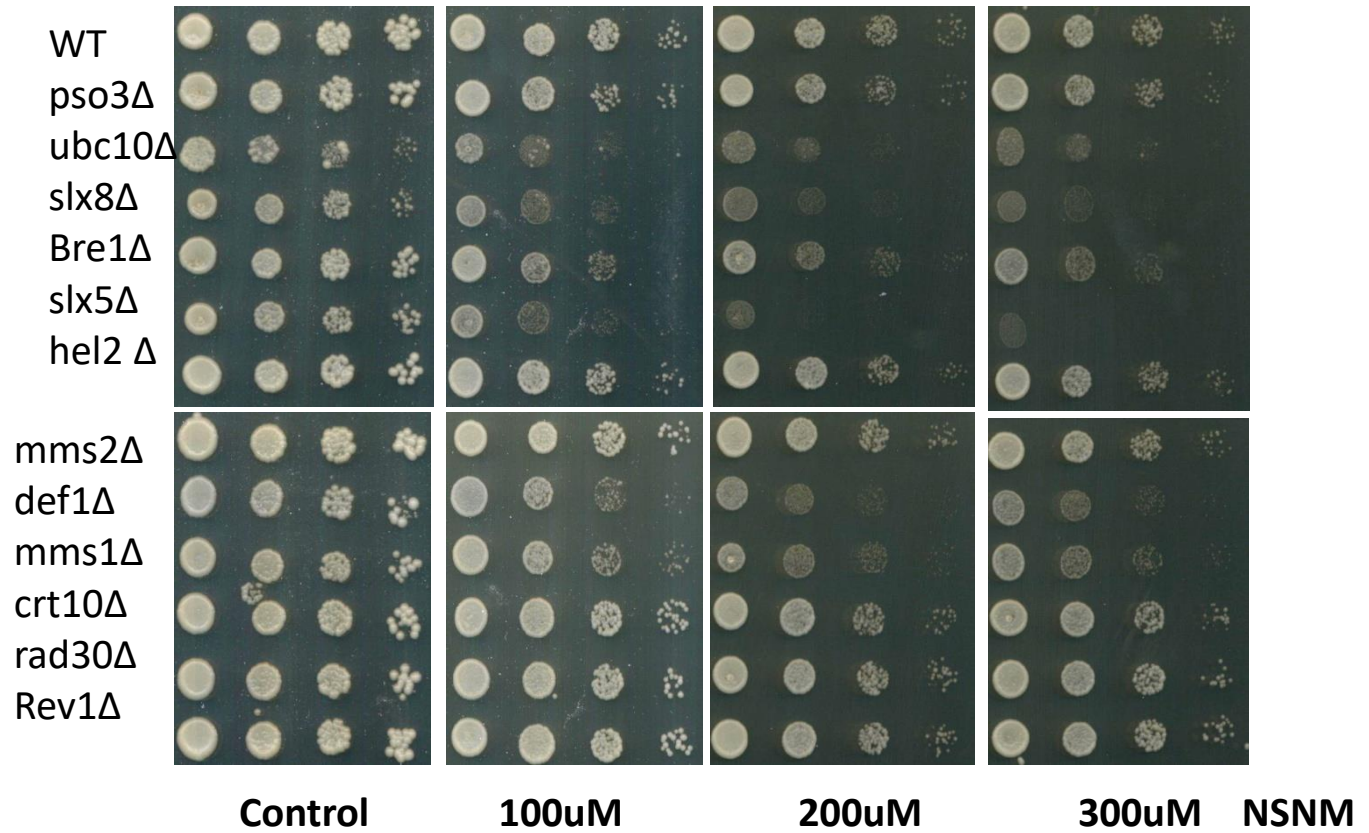

Raw data for revised version of figure 2D

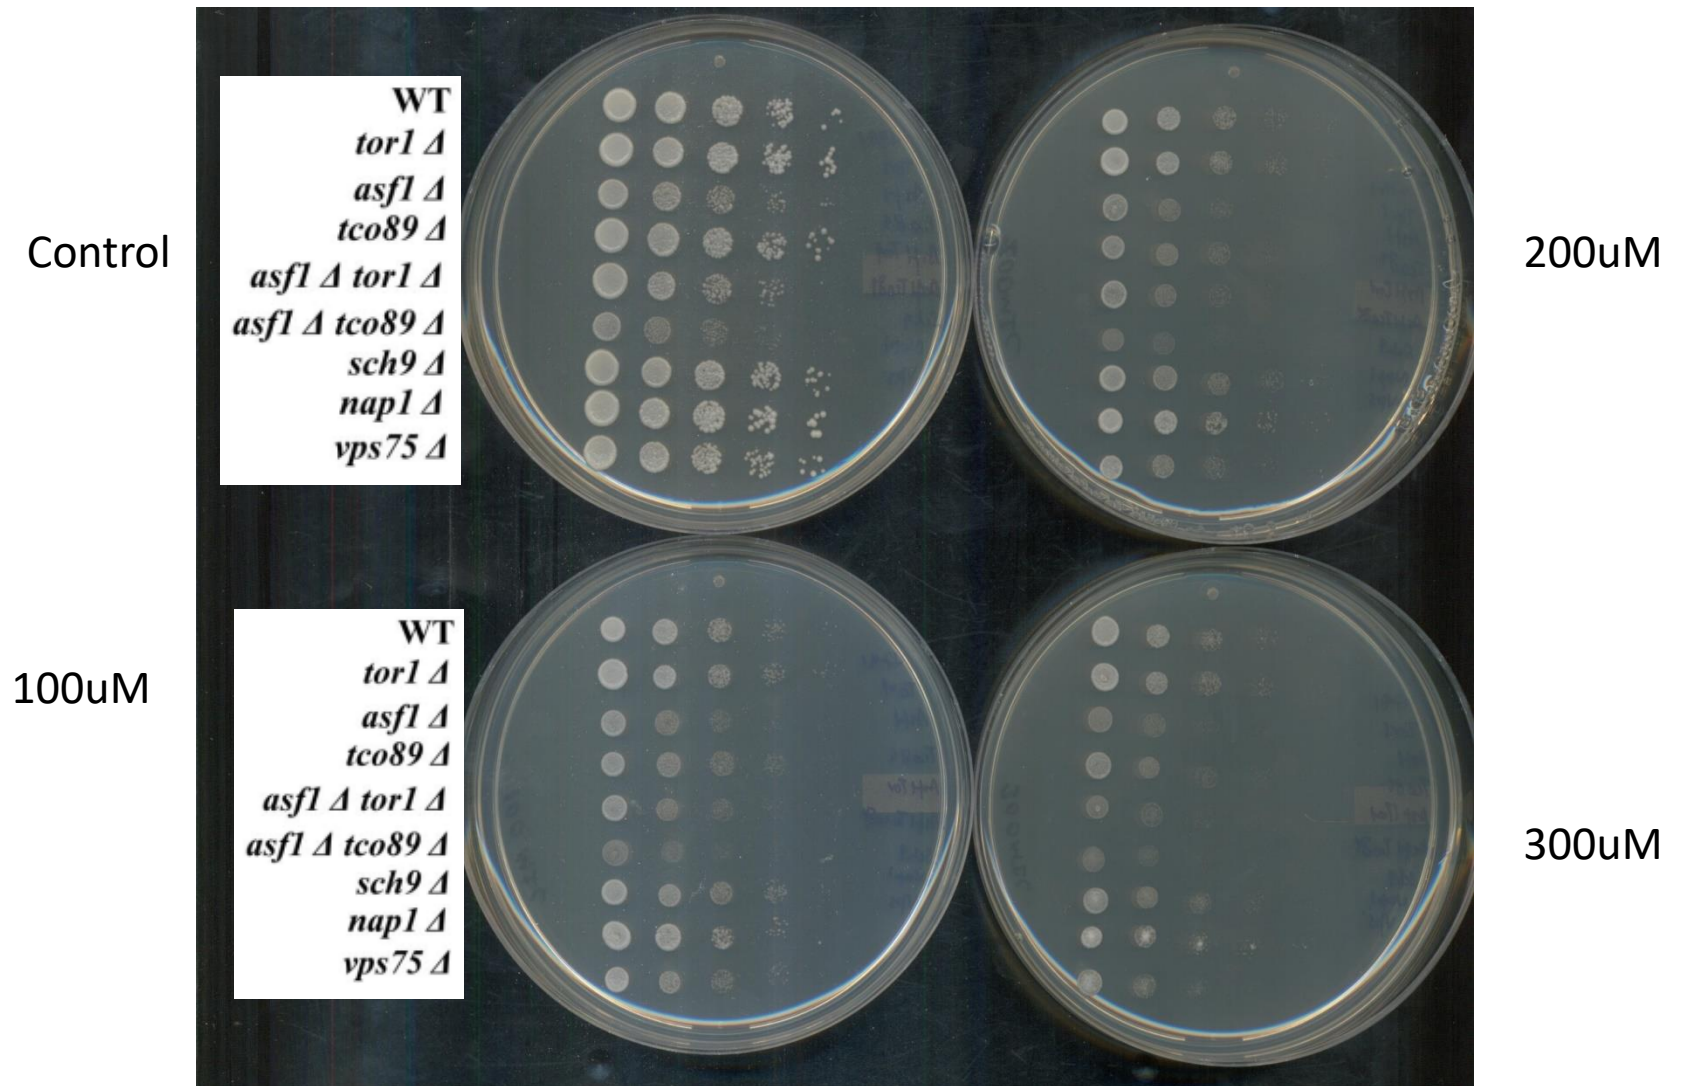

Raw data of figure 6B

**Sml1 YFP**

**DAPI**

**Merge**

**DMSO**

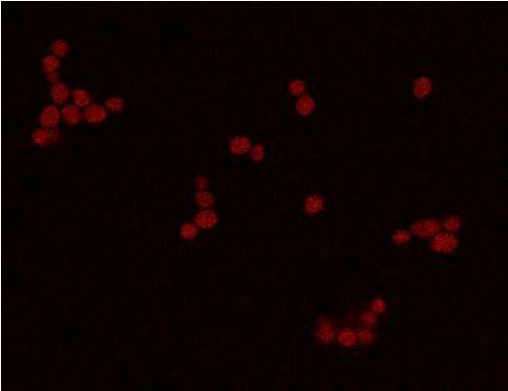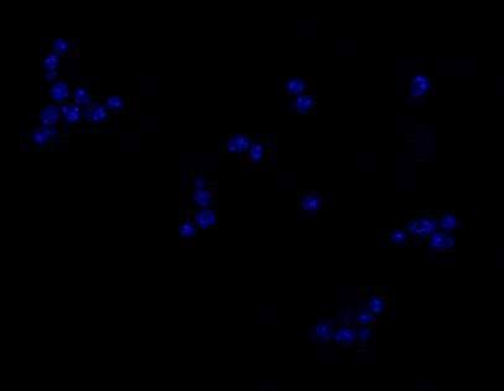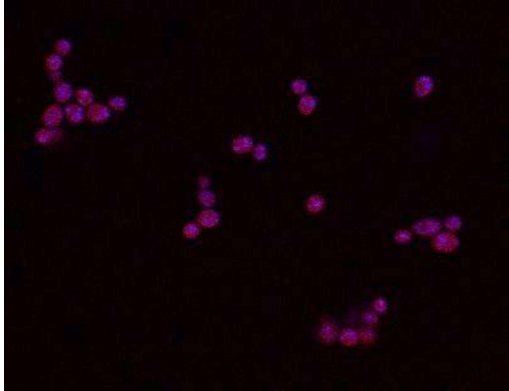

**NSNM  
(100uM)**

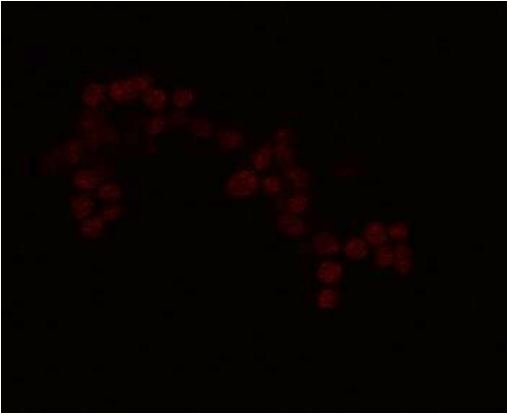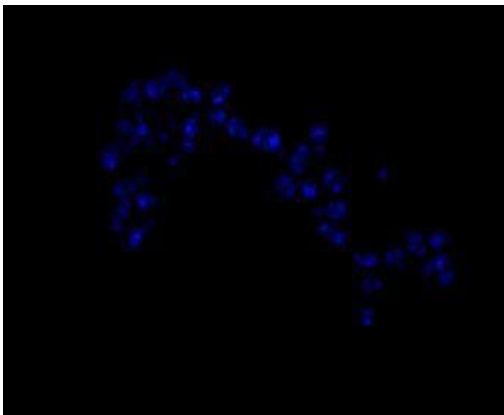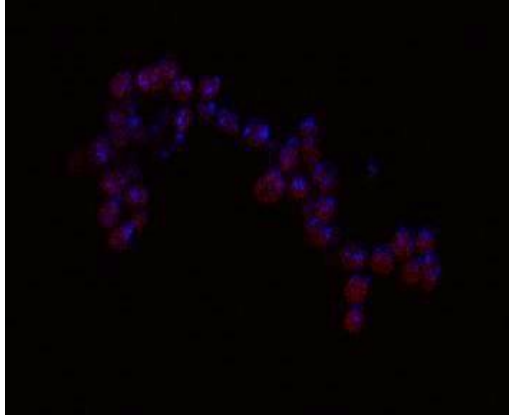

**MMS  
(0.03%)**

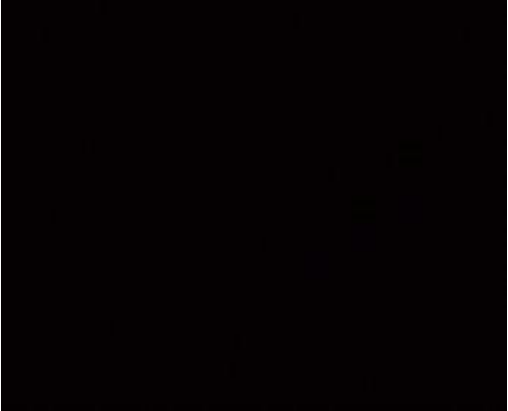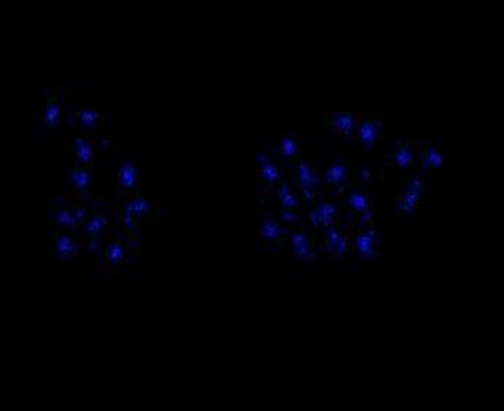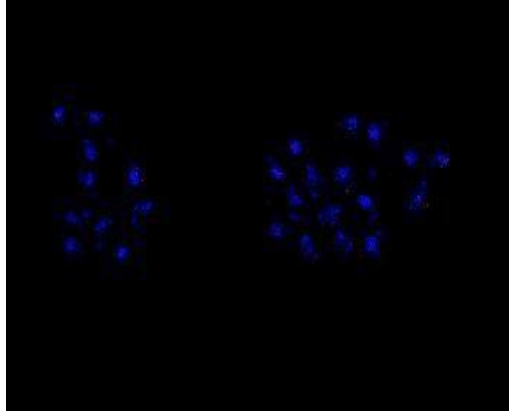

### Raw data of figure 6C

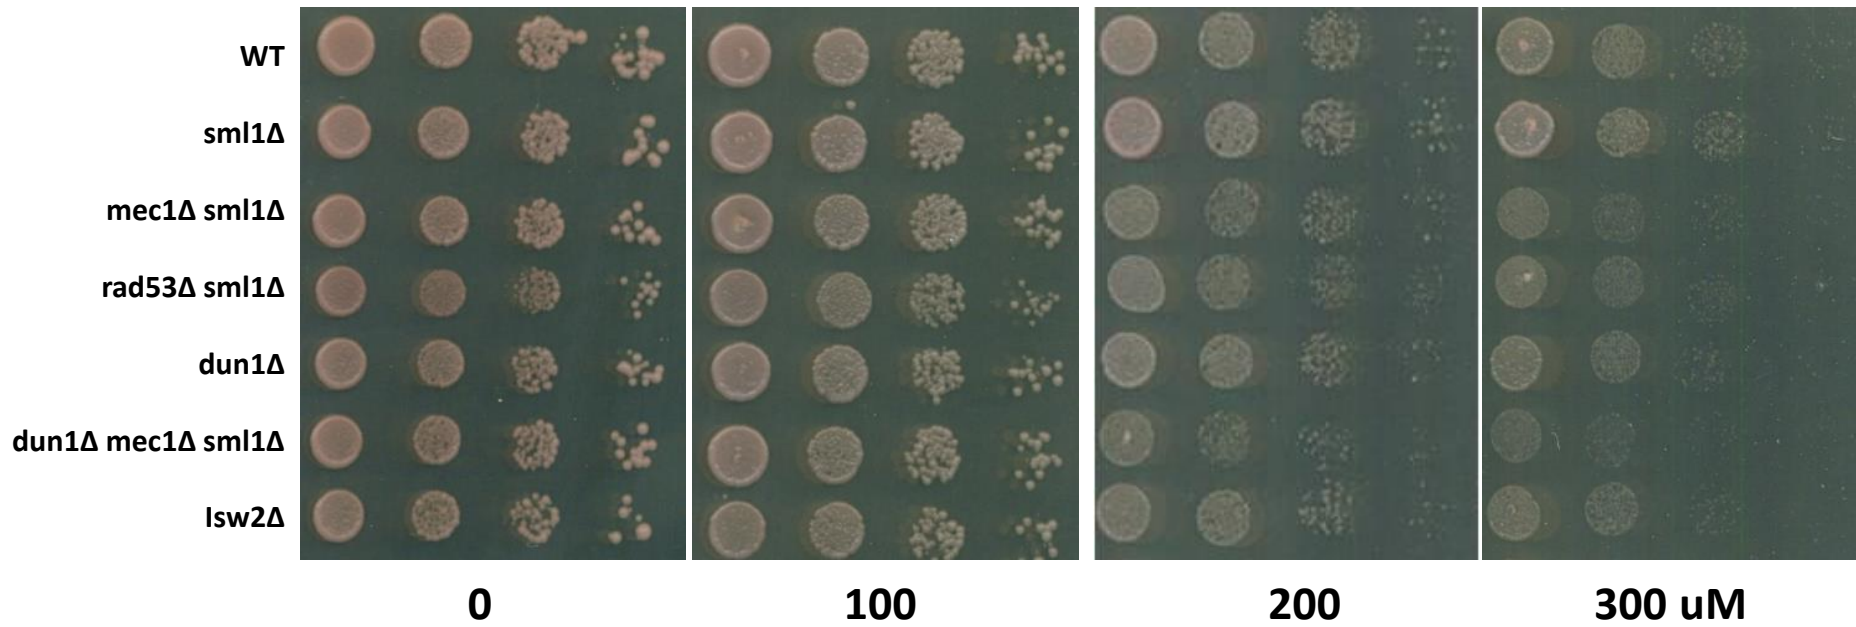

Raw data of figure 6D

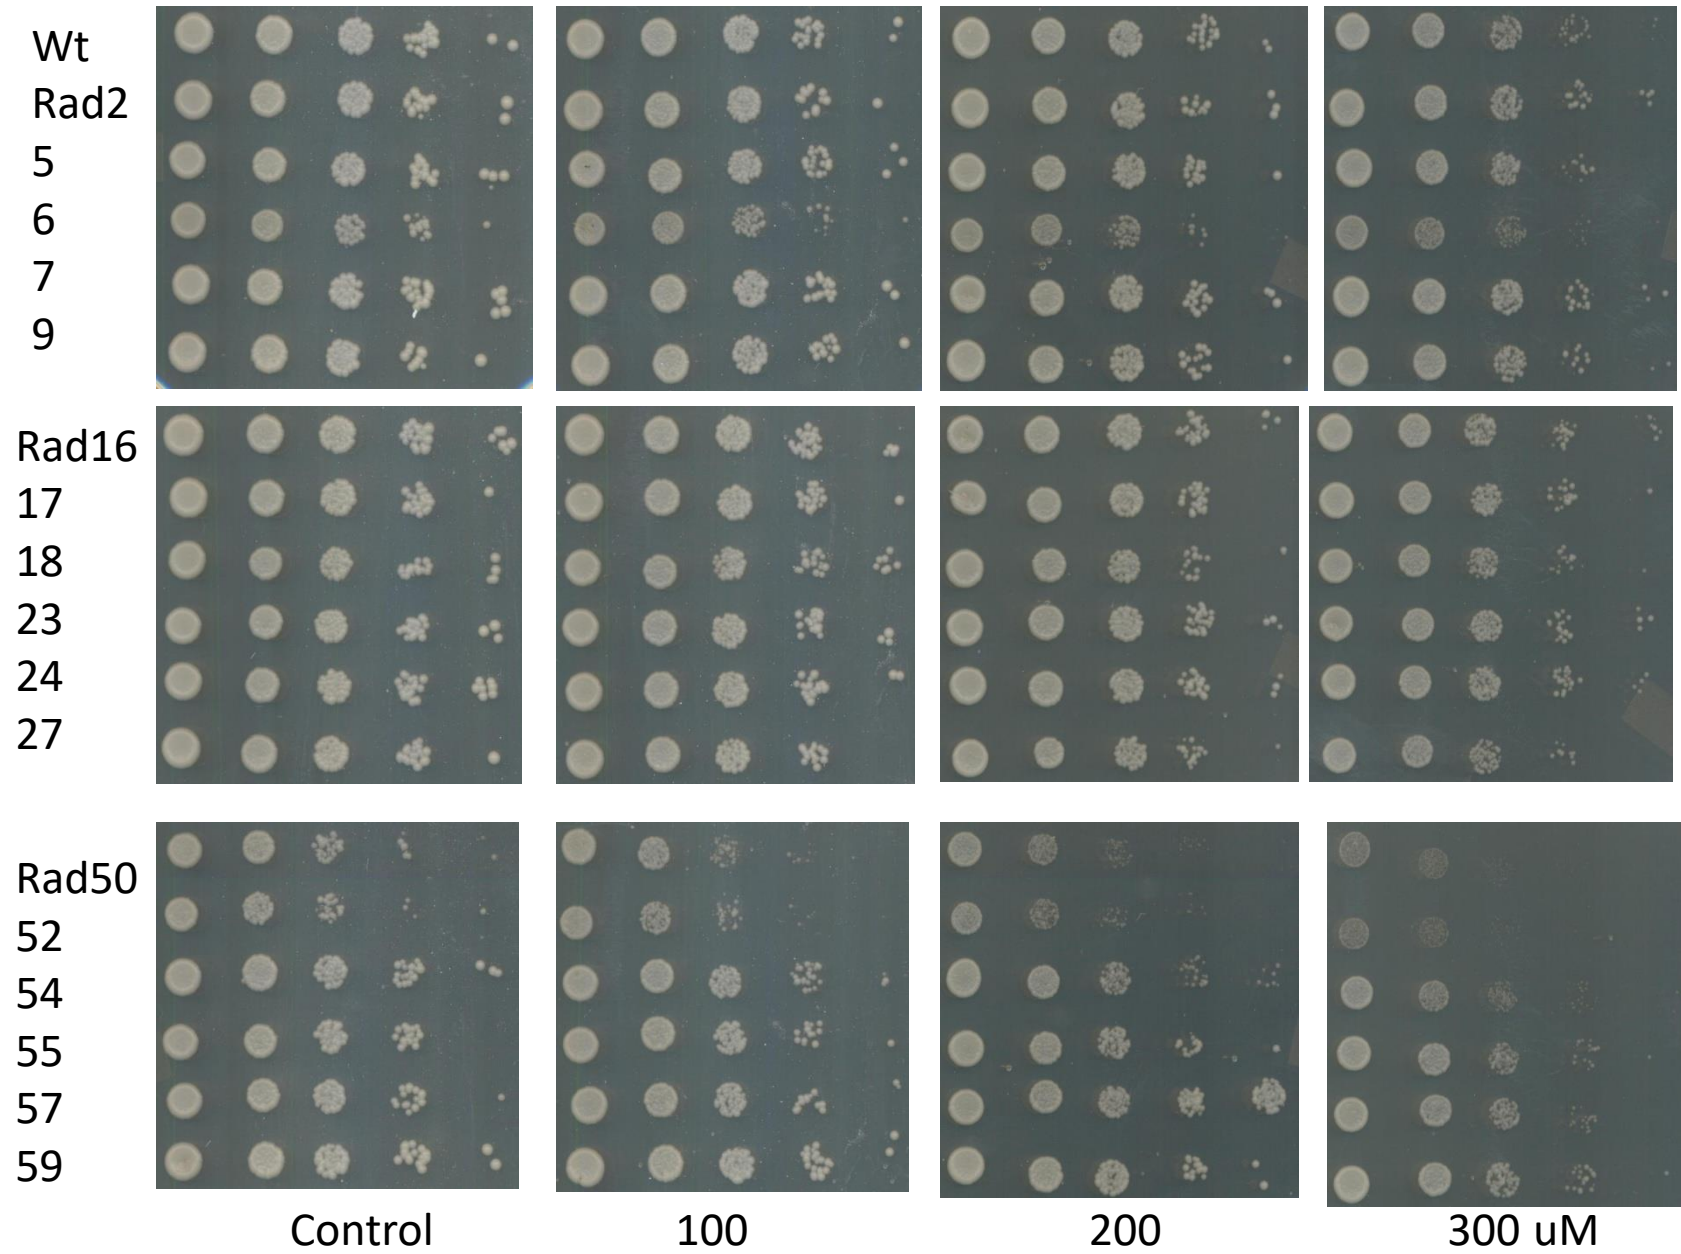

Raw data of figure 6E

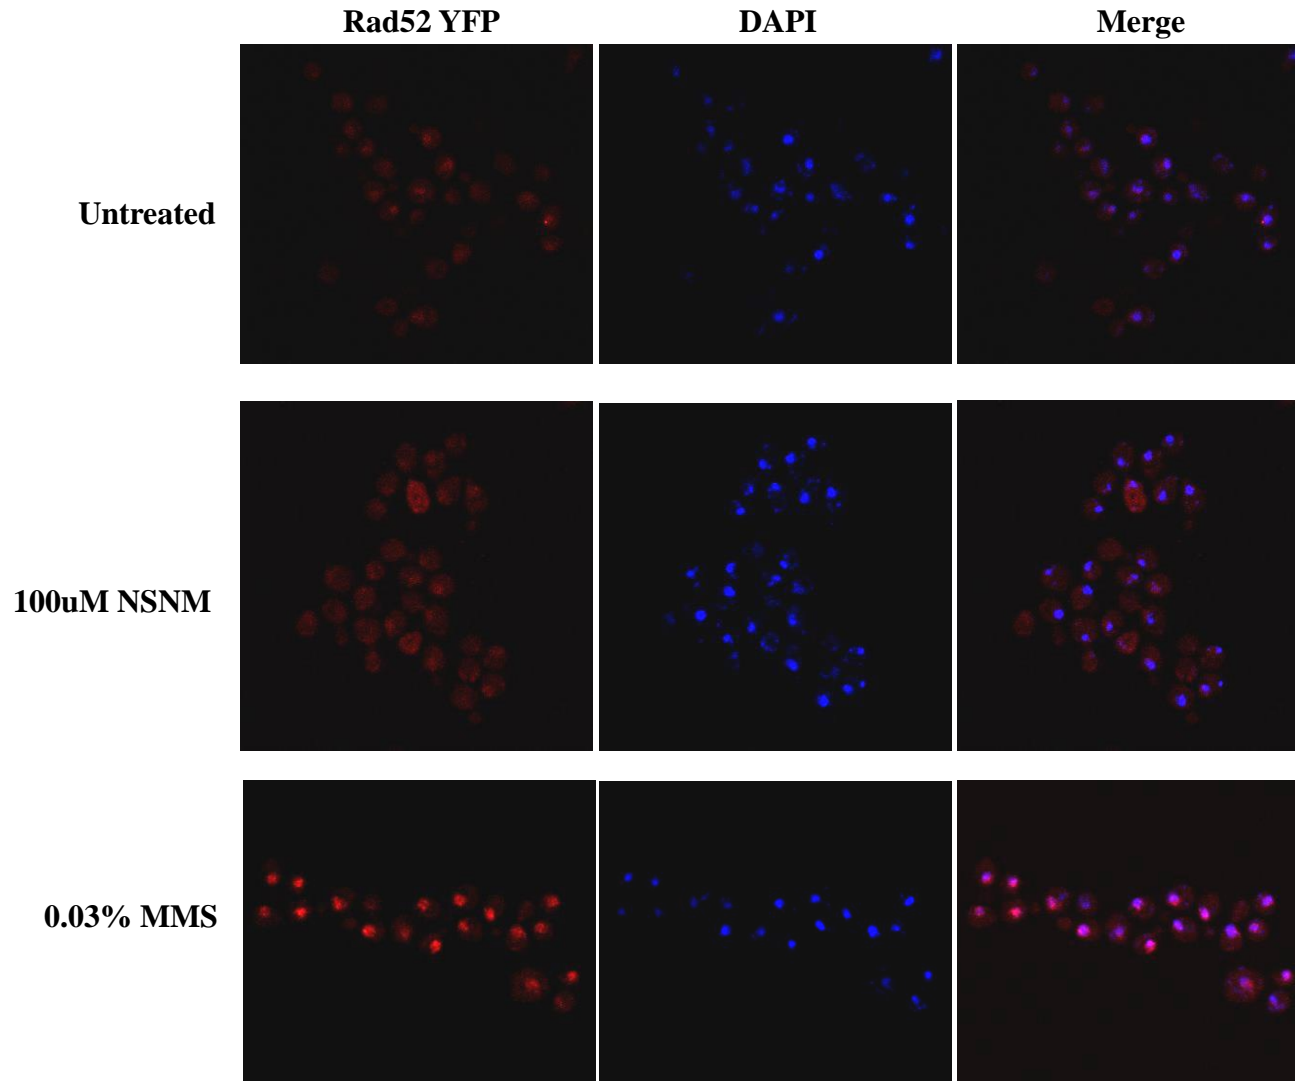

Supplement: pone.0306937.s001.pdf [file pone.0306937.s001.pdf]
